# Supplementary material for: Immunomodulatory Activity of Polysaccharides Isolated from Saussurea salicifolia L. and Saussurea frolovii Ledeb
Source: MDPI journal article supplement (doi:10.3390/molecules28186655), 2023-09-16
Supplement: s1 [file s1]

## Supplementary Material

### Immunomodulatory Activity of Polysaccharides Isolated from *Saussurea salicifolia* L. and *Saussurea frolovii* Ledeb.

Igor A. Schepetkin<sup>1</sup>, Marina G. Danilets<sup>2</sup>, Anastasia A. Ligacheva<sup>2</sup>, Evgenia S. Trofimova<sup>2,3</sup>,  
Natalia S. Selivanova<sup>2</sup>, Evgenii Yu. Sherstoboev<sup>2</sup>, Sergei V. Krivoshchekov<sup>3</sup>, Ekaterina I.  
Gulina<sup>3</sup>, Konstantin S. Brazovsky<sup>3,4</sup>, Liliya N. Kirpotina<sup>1</sup>, Mark T. Quinn<sup>1</sup>, and Mikhail V.  
Belousov<sup>3</sup>

<sup>1</sup>Department of Microbiology and Cell Biology, Montana State University, Bozeman, MT 59717,  
USA

<sup>2</sup>Goldberg Research Institute of Pharmacology and Regenerative Medicine, Tomsk NRMC,  
Tomsk, 634050, Russia

<sup>3</sup>Siberian State Medical University, Tomsk, 634050, Russia

<sup>4</sup>National Research Tomsk Polytechnic University, Tomsk, 634050, Russia

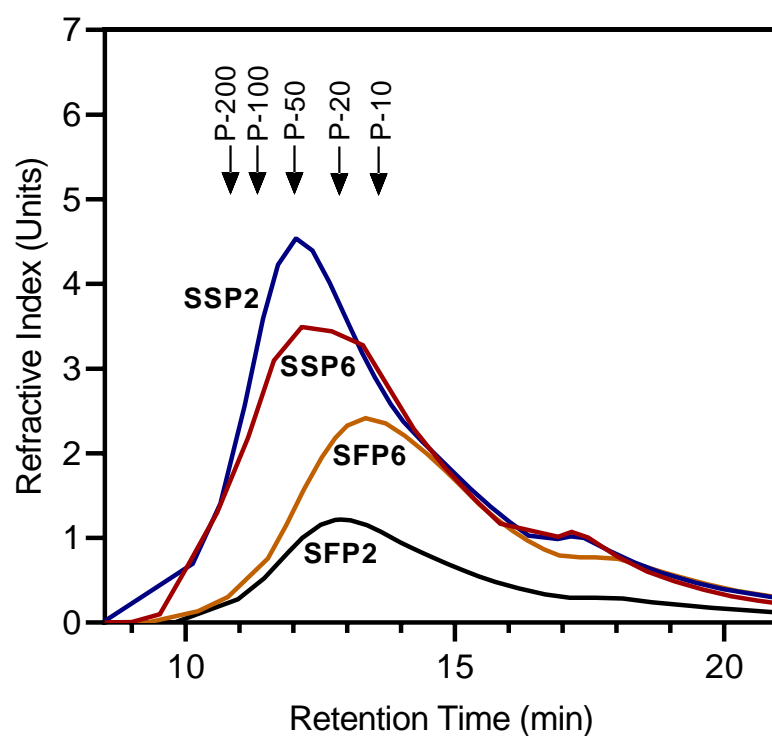

**Figure S1.** High performance size-exclusion chromatography (HP-SEC) analysis of homogeneity and average molecular weight of the polysaccharide fractions isolated from *Saussurea salicifolia* L. and *Saussurea frolovii* Ledeb. Polysaccharide fractions SSP2, SSP6, SFP2, and SFP6 were analyzed by HP-SEC and monitored with a refractive index detector, as described under Material and Methods. The arrows show peak retention times of the indicated pullulan standards used for calibration [P-200 (200 kDa), P-100 (11.3 kDa), P-50 (48.8 kDa), P-20 (23.0 kDa), and P-10 (9.9 kDa)].

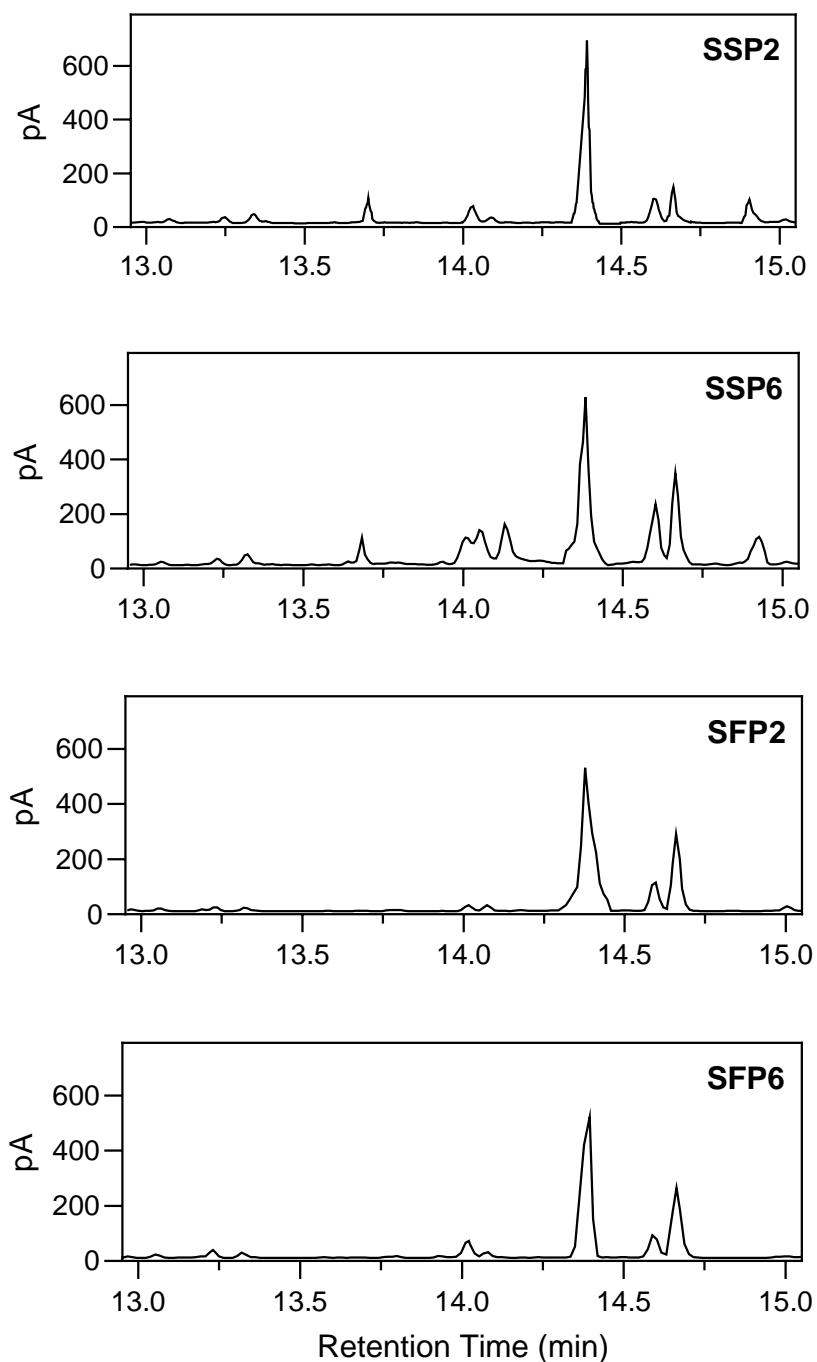

**Figure S2.** Chromatograms of derivatized monosaccharides in the polysaccharide samples isolated from *S. salicifolia* (SSP2 and SSP6) and *S. frolovii* (SFP2 and SFP6) analyzed by gas chromatography/flame ionization detector (GC/FID). The retention times values of standards were 13.68, 14.38, 14.66, and 14.92 min for rhamnose, xylose, glucose, and galactose, respectively.

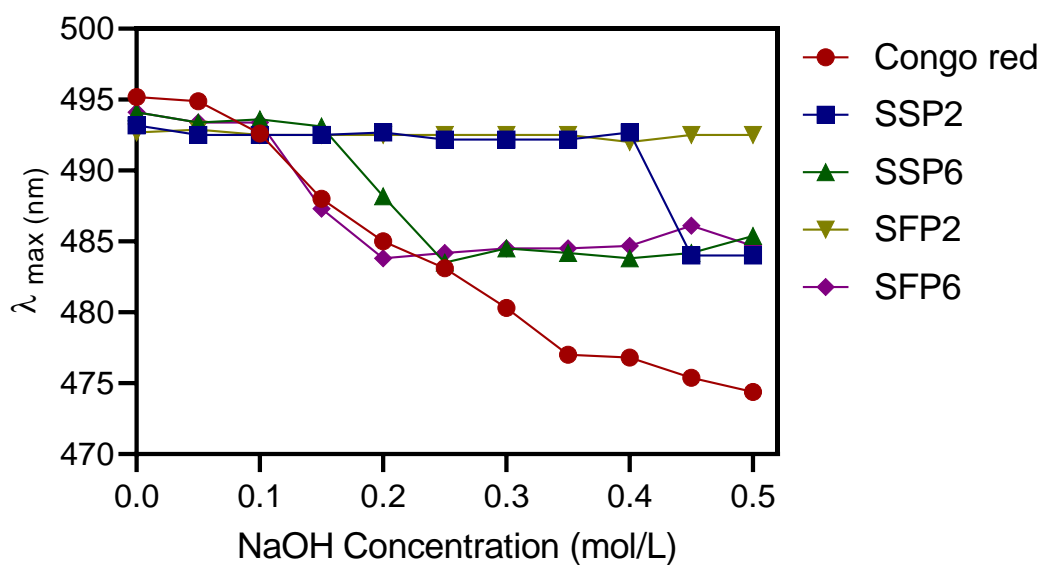

**Figure S3.** Congo red analysis of the polysaccharide fractions.

**Table S1.** Effect of *Saussurea* polysaccharide fractions on macrophage viability

| Concentration | SSP2                                        | SSP6       | SFP2       |
|---------------|---------------------------------------------|------------|------------|
|               | Macrophage Viability (% from Media Control) |            |            |
| 2 µg/mL       | 88.1 ± 1.0                                  | 95.7 ± 1.1 | 95.8 ± 1.9 |
| 20 µg/mL      | 93.9 ± 1.5                                  | 97.7 ± 1.8 | 87.7 ± 0.4 |
| 60 µg/mL      | 87.1 ± 1.6                                  | 96.9 ± 0.5 | 85.8 ± 0.2 |
